# Supplementary material for: Unveiling the Molecular Mechanism of Trastuzumab Resistance in SKBR3 and BT474 Cell Lines for HER2 Positive Breast Cancer
Source: Curr Issues Mol Biol. 2024 Mar 21;46(3):2713–40. doi: 10.3390/cimb46030171 (PMC10969458; doi:10.3390/cimb46030171)
Supplement: Supplementary file 1 [file cimb-46-00171-s001.zip › cimb-2866290-supplementary.xlsx]

## Sheet: Table S1
Table S1: The count of significant results per time-point comparison for 8874 genes showing a time effect in the BT474 cell line.
Contrast	Number of significant genes
T2vsT0	7462
T3vsT0	7030
T4vsT0	4910
T5vsT0	5812
T7vsT0	6285
T3vsT2	834
T4vsT2	2220
T5vsT2	4996
T7vsT2	2458
T4vsT3	1876
T5vsT3	2665
T7vsT3	1371
T5vsT4	2772
T7vsT4	1358
T7vsT5	2325

## Sheet: Table S2
Table S2: The count of significant results per time-point comparison for 13,892 genes showing a time effect in the SKBR3 cell line.
Contrast	Number of significant genes
T2vsT0	9673
T3vsT0	5591
T4vsT0	10998
T5vsT0	8073
T7vsT0	7614
T3vsT2	6364
T4vsT2	9650
T5vsT2	6341
T7vsT2	4334
T4vsT3	8978
T5vsT3	3309
T7vsT3	423
T5vsT4	9332
T7vsT4	8344
T7vsT5	2693

## Sheet: TableS3
Table S3 List of 50 most statistically significantly expressed genes during the whole process of trastuzumab resistance development separately for both biological models: BT474 and SKBR3.
Top 50 most significant in SKBR3 cell line				Top 50 most significant in BT474 cell line
L.P.1-25		L/P.26-50		L.P.1-25		L/P.26-50
GENE	adjp- val	GENE	adjp- val	GENE	adjp- val	GENE	adjp- val
CCL2	7.75e-108	IGFBP3	3.18e-83	KLK11	7.69e-103	CHPT1	1.26e-46
F8A1	2.75e-104	WDR77	3.62e-82	IGF2BP1	3.43e-72	DUSP1	4.83e-46
E2F1	1.06e-102	PFDN6	6.68e-81	GSTM3	1.61e-65	PRMT6	1.39e-45
GINS2	6.48e-100	DDX28	7.41e-81	IGFBP3	3.51e-64	LARP6	1.71e-44
YWHAH	6.48e-100	LTV1	3.43e-80	TNFRSF11B	1.12e-63	HMOX1	6.83e-44
PRMT6	7.7e-100	PRIM1	1.34e-79	RASD1	3.87e-61	FANCA	1.03e-43
DTL	7.88e-99	TOP2B	2.43e-79	CHAF1B	3.87e-58	EXO1	3.83e-43
GSTP1	4.4e-98	CENPE	3.04e-79	TRIT1	1.72e-56	IGFBP2	8.35e-43
BIRC5	6.54e-98	PAK1IP1	3.92e-79	PMP22	8.17e-55	WDHD1	8.71e-43
DOLK	6.54e-98	ORC6	4.32e-79	PSEN1	1.47e-53	PPP2CA	1.57e-42
SAP30	7.56e-92	CHPT1	5.46e-79	PLAT	2.55e-53	RPP40	9.07e-42
RPP40	1.34e-91	TRMT10C	2.75e-78	BIRC5	2.72e-52	FLVCR1	9.6e-42
RTN4IP1	3.91e-90	PSEN2	8.04e-77	USP1	2.05e-51	AGO2	1.16e-41
HN1	6.68e-90	EBNA1BP2	9.03e-77	ZNF195	2.24e-51	PRIM1	2.06e-41
C20orf24	8.33e-90	PPP2CA	1.13e-76	C6orf48	2.7e-51	GSTP1	2.52e-41
EXO1	1.12e-88	TDRD7	2.51e-76	ADM	2.71e-51	TMEM43	5.23e-41
KIAA0101	4.33e-88	NMI	2.9e-76	RND3	1.9e-50	HMBS	1.1e-40
TFRC	2.62e-87	JDP2	1.17e-75	CEBPB	1.56e-49	FAHD1	1.19e-40
NACC2	1.5e-86	MIF	1.21e-75	PLA2G16	1.56e-49	PTGES3L-AARSD1	3.5e-40
DDIT4	2.5e-86	CBFB	1.5e-75	E2F1	3.43e-49	KNTC1	6.69e-40
CNOT10	2.8e-86	AVEN	1.89e-75	KIAA0586	3.7e-49	GINS2	4.23e-39
FAHD1	7.38e-84	GAPDH	2.1e-74	ADK	4e-49	B2M	2.17e-38
USP1	7.38e-84	LOXL2	4.37e-74	TFRC	8.21e-48	CCNA2	2.17e-38
MGST2	1.77e-83	KIAA0586	6.8e-73	CENPE	3.12e-47	EIF2B3	2.17e-38
BRCA1	2.59e-83	ZNF195	1.6e-72	ERO1L	3.12e-47	LTV1	2.17e-38

## Sheet: Table S4
Table S4: Top 25 genes associated with trastuzumab resistance in the BT474 cell line, along with concise descriptions of their functions, sourced from NCBI and GeneCards® human gene database.
gene - name	gene - full name	main molecular functions
KLK11	kallikrein related peptidase 11	A subgroup of serine proteases having diverse physiological functions; are implicated in carcinogenesis, have potential as novel cancer and other disease biomarkers.
IGF2BP1	insulin like growth factor 2 mRNA binding protein 1	It binds to the mRNAs of certain genes, including insulin-like growth factor 2, beta-actin and beta-transducin repeat-containing protein, regulating their translation.
GSTM3	glutathione S- transferase mu 3	It has functions in the detoxification of electrophilic compounds, including carcinogens, therapeutic drugs, environmental toxins and products of oxidative stress, by conjugation with glutathione; highly polimorphic, change an individual's susceptibility to carcinogens and toxins as well as affect the toxicity and efficacy of certain drugs.
IGFBP3	insulin like growth factor binding protein 3	The protein forms a ternary complex with insulin-like growth factor acid-labile subunit (IGFALS) and either insulin-like growth factor (IGF) I or II. In this form, it circulates in the plasma, prolonging the half-life of IGFs and altering their interaction with cell surface receptors.
TNFRSF11B	TNF receptor superfamily member 11b	The protein encoded by this gene is a member of the TNF-receptor superfamily, are key extracellular regulators of osteoclast development, play a role in lymph-node organogenesis and vascular calcification.
RASD1	ras related dexamethasone induced 1	The gene encodes a member of the Ras superfamily of small GTPases and is induced by dexamethasone may play a role in dexamethasone-induced alterations in cell morphology, growth and cell-extracellular matrix interactions. Epigenetic inactivation of this gene is closely correlated with resistance to dexamethasone.
CHAF1B	chromatin assembly factor 1 subunit B	Play a crucial role in assembly of histone octamers onto newly- replicated DNA, it is required for chromatin assembly after replication.
TRIT1	tRNA isopentenyl transferase 1	This gene encodes a protein that is targeted to the mitochondrion and modifies transfer RNAs (tRNAs), is considered a tumor suppressor and its expression can decrease cellgrowth.
PMP22	peripheral myelin protein 22	This gene encodes an integral membrane protein that is a major component of myelin in the peripheral nervous system.
PSEN1	presenilin 1	Presenilins are postulated to regulate amyloid precursor protein processing through their effects on gamma-secretase, an enzyme that cleaves APP. Also, it is thought that the presenilins are involved in the cleavage of the Notch receptor, such that they either directly regulate gamma-secretase activity or themselves are protease enzymes.
PLAT	plasminogen activator, tissue type	It is secreted serine protease that converts the proenzyme plasminogen to plasmin, may play a role in cell migration and tissue remodeling.
BIRC5	baculoviral IAP repeat containing 5	This gene encode negative regulatory proteins that prevent apoptotic cell death. Gene expression is high during fetal development and in most tumors, yet low in adult tissues.
USP1	ubiquitin specific peptidase 1	The product of this gene cleaves the ubiquitin moiety from ubiquitin- fused precursors and ubiquitinylated proteins. The protein specifically deubiquitinates a protein in the Fanconi anemia (FA) DNA repair pathway.
ZNF195	zinc finger protein 195	This gene encodes a protein belonging to the Krueppel C2H2-type zinc-finger protein family. These family members are transcription factors that are implicated in a variety of cellular processes.
C6orf48/ SNHG32	small nucleolar RNA host gene 32	N.A.
ADM	adrenomedullin	The gene is a preprohormone which is cleaved to form two biologically active peptides,with several functions, including vasodilation, regulation of hormone secretion, promotion of angiogenesis, and antimicrobial activity.
RND3	Rho family GTPase 3	This gene encodes a protein which is a member of the small GTPase protein superfamily. The encoded protein binds only GTP but has no GTPase activity, and appears to act as a negative regulator of cytoskeletal organization leading to loss of adhesion.
CEBPB	CCAAT enhancer binding protein beta	The gene encodes a transcription factor that contains a basic leucine zipper (bZIP) domain. Activity of this protein is important in the regulation of genes involved in immune and inflammatory responses, among other processes.
PLA2G16/ PLAAT3	phospholipase A and acyltransferase 3	A key regulator of adipocyte lipolysis by catalyzing the release of fatty acids from phospholipids in adipose tissue, Acts as a host factor forpicornaviruses
E2F1	E2F transcription factor 1	Plays a crucial role in the control of cell cycle and action of tumor suppressor proteins and is also a target of the transforming proteins of small DNA tumor viruses. This protein binds preferentially to retinoblastoma protein pRB in a cell-cycle dependent manner. It can mediate both cell proliferation and p53-dependent/independent apoptosis.
KIAA0586	KIAA0586	This gene encodes a conserved centrosomal protein that functions in ciliogenesis and responds to hedgehog signaling.
ADK	adenosine kinase	This gene encodes an enzyme which catalyzes the transfer of the gamma-phosphate from ATP to adenosine, thereby serving as a regulator of concentrations of both extracellular adenosine and intracellular adenine nucleotides.
TFRC	transferrin receptor	The gene encodes a cell surface receptor necessary for cellular iron uptake by the process of receptor-mediated endocytosis.
CENPE	centromere protein E	It is a kinesin-like motor protein that accumulates in the G2 phase of the cell cycle, required for stable spindle microtubule capture at kinetochores is protein also couples chromosome position to microtubule depolymerizing activity.
ERO1L	endoplasmic reticulum oxidoreductase 1 alpha	Oxidoreductase involved in disulfide bond formation in the endoplasmic reticulum.

## Sheet: Table S5
Table S5: Top 25 genes associated with trastuzumab resistance in the SKBR3 cell line, along with concise descriptions of their functions, sourced from NCBI and GeneCards® human gene database.
gene - name	gene - full name	main molecular functions
CCL2	C-C motif chemokine ligand 2	This chemokine is a member of the CC subfamily which is characterized by two adjacent cysteine residues. This cytokine displays chemotactic activity for monocytes and basophils but not for neutrophils or eosinophils.
F8A1	coagulation factor VIII associated 1	This gene is contained entirely within intron 22 of the factor VIII gene. Although its function is unknown, the observation that this gene is conserved in the mouse implies it has some function.
E2F1	E2F transcription factor 1	Plays a crucial role in the control of cell cycle and action of tumor suppressor proteins and is also a target of the transforming proteins of small DNA tumor viruses. This protein binds preferentially to retinoblastoma protein pRB in a cell-cycle dependent manner. It can mediate both cell proliferation and p53-dependent/independent apoptosis.
GINS2	GINS complex subunit 2	The formation of this complex is essential for the initiation of DNA replication and progression of DNA replication forks
YWHAH	tyrosine 3- monooxygenase/try ptophan 5- monooxygenase activation protein eta	This gene product belongs to the 14-3-3 family of proteins which mediate signal transduction by binding to phosphoserine-containing proteins. This highly conserved protein family. are involved in many vital cellular processes such as metabolism, protein trafficking, signal transduction, apoptosis and cell cycle regulation.
PRMT6	protein arginine methyltransferase 6	Catalyze the sequential transfer of methyl group from S-adenosyl-L- methionine to the side chain nitrogens of arginine residues within proteins, to form methylated arginine derivatives and S-adenosyl-L- homocysteine. Play role in stimulation of polymerase activity by enhancing DNA binding and processivity.
DTL	denticleless E3 ubiquitin protein ligase homolog	A unit of a complex required for cell cycle control, DNA damage response and translesion DNA synthesis mediates the polyubiquitination and subsequent degradation of CDT1 necessary to ensure proper cell cycle regulation of DNA replication
GSTP1	glutathione S- transferase pi 1	Glutathione S-transferases (GSTs) are a family of enzymes that play an important role in detoxification by catalyzing the conjugation of many hydrophobic and electrophilic compounds with reduced glutathione. This GST family member is a polymorphic gene encoding active, functionally different GSTP1 variant proteins that are thought to function in xenobiotic metabolism and play a role in susceptibi…
BIRC5	baculoviral IAP repeat containing 5	The gene encode negative regulatory proteins that prevent apoptotic cell death, Gene expression is high during fetal development and in most tumors, yet low in adult tissues
DOLK	dolichol kinase	The protein encoded by this gene catalyzes the CTP-mediated phosphorylation of dolichol, and is involved in the synthesis of Dol-P- Man, which is an essential glycosyl carrier lipid for C- and O- mannosylation, N- and O-linked glycosylation of proteins, and for the biosynthesis of glycosyl phosphatidylinositol anchors in endoplasmic reticulum
SAP30	Sin3A associated protein 30	The protein encoded by this gene is a component of the histone deacetylase complex. This complex is active in deacetylating core histone octamers, but inactive in deacetylating nucleosomal histones.
RPP40	ribonuclease P/MRP subunit p40	Component of ribonuclease P, a protein complex that generates mature tRNA molecules by cleaving their 5'-ends.
RTN4IP1	reticulon 4 interacting protein 1	This gene encodes a mitochondrial protein that interacts with reticulon 4, which is a potent inhibitor of regeneration following spinal cord injury
HN1	complement factor H	This gene is a member of the Regulator of Complement Activation (RCA) gene cluster and encodes a protein with twenty short consensus repeat (SCR) domains. This protein is secreted into the bloodstream and has an essential role in the regulation of complement activation, restricting this innate defense mechanism to microbial infections.
C20orf24/ RAB5IF	RAB5 interacting factor	N.A.
EXO1	exonuclease 1	This gene encodes a protein with 5' to 3' exonuclease activity as well as an RNase H activity. It is similar to the Saccharomyces cerevisiae protein Exo1 which interacts with Msh2 and which is involved in mismatch repair and recombination.
KIAA0101/ PCLAF	PCNA clamp associated factor	PCNA-binding protein that acts as a regulator of DNA repair during DNA replication. Following DNA damage, the interaction with PCNA is disrupted, facilitating the interaction between monoubiquitinated PCNA and the translesion DNA synthesis DNA polymerase eta (POLH) at stalled replisomes, facilitating the bypass of replication- fork-blocking lesions.
TFRC	transferrin receptor	This gene encodes a cell surface receptor necessary for cellular iron uptake by the process of receptor-mediated endocytosis.
NACC2	NACC family member 2	Functions as a transcriptional repressor through its association with the NuRD complex. Recruits the NuRD complex to the promoter of MDM2, leading to the repression of MDM2 transcription and subsequent stability of p53/TP53.
DDIT4	DNA damage inducible transcript 4	Regulates cell growth, proliferation and survival via inhibition of the activity of the mammalian target of rapamycin complex 1 (mTORC1). Inhibition of mTORC1 is mediated by a pathway that involves DDIT4/REDD1, AKT1, the TSC1-TSC2 complex and the GTPase RHEB. Plays an important role in responses to cellular energy levels and cellular stress, including responses to hypoxia and DNA damage. Regulate…
CNOT10	CCR4-NOT transcription complex subunit 10	Component of the CCR4-NOT complex which is one of the major cellular mRNA deadenylases and is linked to various cellular processes including bulk mRNA degradation, miRNA-mediated repression, translational repression during translational initiation and general transcription regulation.
FAHD1	fumarylacetoacetate hydrolase domain containing 1	Probable mitochondrial acylpyruvase which is able to hydrolyze acetylpyruvate and fumarylpyruvate in vitro. Also has oxaloacetate decarboxylase activity
USP1	ubiquitin specific peptidase 1	cleaves the ubiquitin moiety from ubiquitin-fused precursors and ubiquitinylated proteins. The protein specifically deubiquitinates a protein in the Fanconi anemia (FA) DNA repair pathway.
MGST2	microsomal glutathione S- transferase 2	The MAPEG (Membrane Associated Proteins in Eicosanoid andGlutathione metabolism) family consists of six human proteins,several of which are involved in the production of leukotrienes andprostaglandin E, important mediators of inflammation. Among itsrelated pathways are Drug metabolism - cytochrome P450
BRCA1	BRCA1 DNA repair associated	This gene encodes a nuclear phosphoprotein that plays a role in maintaining genomic stability, and it also acts as a tumor suppressor. The encoded protein combines with other tumor suppressors, DNA damage sensors, and signal transducers to form a large multi- subunit protein complex known as the BRCA1-associated genome surveillance complex (BASC).

## Sheet: Table S6
Table S6: The number of statistically significant results per time-point comparison for 2540 microRNAs (BT474 cell line) and 2541 microRNA (SKBR3 cell line), with an overall time effect.
BT474 cell line		SKBR3 cell line
Contrast	Number of significant microRNAs	Contrast	Number of significant microRNAs
T2vsT0	1760	T2vsT0	1835
T3vsT0	471	T3vsT0	1702
T4vsT0	1782	T4vsT0	2122
T5vsT0	1699	T5vsT0	1036
T7vsT0	2011	T7vsT0	2037
T3vsT2	1793	T3vsT2	575
T4vsT2	323	T4vsT2	987
T5vsT2	570	T5vsT2	1989
T7vsT2	2093	T7vsT2	301
T4vsT3	1878	T4vsT3	1043
T5vsT3	1723	T5vsT3	1678
T7vsT3	1827	T7vsT3	508
T5vsT4	567	T5vsT4	2460
T7vsT4	1970	T7vsT4	912
T7vsT5	2241	T7vsT5	2120

## Sheet: Table S7
Table S7: The list of microRNAs for which all pairwise time-point comparisons were statistically significant in BT474 and SKBR3 separately.
BT474		SKBR3
hsa-miR-574-3p	hsa-miR-654-3p	hsa-miR-7977	hsa-miR-16-5p
hsa-miR-1207-5p	hsa-miR-3195	hsa-miR-6826-5p	hsa-miR-466
hsa-miR-8485	hsa-miR-3613-3p	hsa-miR-6165	hsa-miR-4652-3p
hsa-miR-4254	hsa-miR-4763-3p	hsa-miR-5739	hsa-miR-4313
hsa-miR-3591-3p	hsa-miR-4459	hsa-miR-24-3p	hsa-miR-6858-3p
hsa-miR-6775-3p	hsa-miR-6891-5p	hsa-miR-4530	hsa-miR-6741-3p
hsa-miR-6743-3p	hsa-miR-4485-3p	hsa-miR-6869-5p	hsa-miR-6855-3p
hsa-miR-483-3p	hsa-miR-130b-3p	hsa-miR-15b-5p	hsa-miR-6775-3p
hsamiR-4730	hsa-miR-8071	hsa-miR-8485	hsa-miR-6514-3p
hsa-miR-4758-3p	hsa-miR-4485-5p	hsa-miR-6090	hsa-miR-6812-3p
hsa-miR-6804-3p	hsa-miR-4446-5p	hsa-miR-4516	hsa-miR-5088-5p
hsa-miR-6815-3p	hsa-miR-638	hsa-miR-3151-3p	hsa-miR-3127-5p
hsa-miR-6716-3p	hsa-miR4788	hsa-miR-4485-5p	hsa-miR-320d
hsa-miR-1225-5p	hsa-miR-6817-5p	hsa-miR-3162-3p	hsa-let-7c-5p
hsamiR-6732-3p		hsa-miR-6886-3p	hsa-miR-3148
hsa-miR-6779-3p		hsa-miR-575	hsa-miR-6737-3p
hsa-miR-34b-3p		hsa-miR-3960	hsa-miR-6766-3p
hsa-miR-6797-3p		hsa-miR-4701-5p	hsa-miR-5196-5p
hsa-miR-6780b-5p		hsa-miR-4281
hsa-miR-6799-5p		hsa-miR-4254

## Sheet: TableS8
Table S8 List of 50 most statistically significantly expressed microRNAs during the whole process of trastuzumab resistance development separately for both biological models: BT474 and SKBR3.
Top 50 most significant in SKBR3cellline					Top 50 most significant in BT474 cellline
L.P. 1-25		L/P. 26-50			L.P. 1-25			L/P. 26-50
microRNA	adj p- val	microRNA		adj p- val	microRNA		adj p- val	microRNA	adj p- val
hsa-miR-7977	1.1e-235	hsa-miR-6875- 5p		1.1e-147	hsa-miR-574- 3p		2.2e-213	hsa-miR-4652- 3p	3.6e-163
hsa-miR-6826-5p	2.2e-214	hsa-miR-4516		8.6e-147	hsa-miR-1207- 5p		4.5e-204	hsa-miR-4290	7.8e-163
hsa-miR-7975	6.5e-203	hsa-miR-3151- 3p		1e-146	hsa-miR-8485		4.3e-197	hsa-miR-4730	1e-162
hsa-miR-6165	1.7e-190	hsa-miR-4485- 5p		6.2e-146	hsa-miR-6886- 3p		6.5e-196	hsa-miR-6087	2.2e-161
hsa-miR-5739	4.6e-185	hsa-miR-3162- 3p		1.3e-140	hsa-miR-6088		3.4e-190	hsa-miR-4758- 3p	1.4e-159
hsa-miR-574-3p	4.6e-185	hsa-miR-6886- 3p		3.3e-140	hsa-miR-4254		5.6e-190	hsa-miR-6858- 3p	1.6e-159
hsa-let-7a-5p	3.2e-179	hsa-miR-6807- 5p		9e-140	hsa-miR-4701- 5p		2.2e-185	hsa-miR-6804- 3p	3.4e-159
hsa-miR-6749-5p	5.6e-176	hsa-miR-1260b		2.3e-138	hsa-miR-3151- 3p		4.5e-184	hsa-miR-4728- 3p	1.2e-157
hsa-miR-3162-5p	8.4e-173	hsa-miR-6089		1.2e-136	hsa-miR-197- 3p		1.7e-182	hsa-miR-6815- 3p	1.2e-157
hsa-miR-1202	1.5e-171	hsa-let-7i-5p		7.1e-136	hsa-miR-1825		4.5e-180	hsa-miR-6869- 5p	2e-157
hsa-miR-4284	2.6e-168	hsa-miR-210- 3p		7.4e-136	hsa-miR-6834- 3p		4.5e-180	hsa-miR-6861- 3p	5.1e-157
hsa-let-7e-5p	2.1e-167	hsa-miR-4649- 3p		1.9e-135	hsa-miR-4281		5.7e-180	hsa-miR-6514- 3p	8.8e-157
hsa-miR-24-3p	1.5e-165	hsa-miR-6127		2.5e-134	hsa-miR-3591- 3p		1.3e-177	hsa-miR-6826- 5p	2.4e-156
hsa-miR-5100	4.5e-163	hsa-miR-575		7.9e-134	hsa-miR-6775- 3p		2.4e-177	hsa-miR-6716- 3p	3.2e-156
hsa-miR-4530	7.4e-163	hsa-miR-7114- 5p		9.5e-134	hsa-miR-466		2.2e-174	hsa-miR-6756- 3p	2.2e-155
hsa-miR-6869-5p	2.1e-161	hsa-miR-3960		2.1e-133	hsa-miR-4649- 3p		2.9e-173	hsa-miR-6776- 3p	5.3e-155
hsa-miR-6085	3e-161	hsa-miR-5194		7e-131	hsa-miR-1281		2.4e-172	hsa-miR-6784- 3p	6.8e-155
hsa-miR-15b-5p	1.6e-156	hsa-miR-4701- 5p		1.1e-129	hsa-miR-6743- 3p		5.9e-171	hsa-miR-328- 3p	8.2e-155
hsa-miR-20a-5p	1.6e-156	hsa-let-7b-5p		6e-129	hsa-miR- 4436b-5p		5.5e-170	hsa-miR-1225- 5p	1.2e-154
hsa-miR-574-5p	5.1e-155	hsa-miR-106b- 5p		1.1e-128	hsa-miR-4530		2e-166	hsa-miR-3940- 3p	1.4e-154
hsa-miR-8485	1.7e-153	hsa-miR-4281		4.6e-128	hsa-miR-3162- 3p		5.3e-166	hsa-miR-1234- 3p	9.1e-154
hsa-miR-197-3p	7e-152	hsa-miR-6763- 5p		9.6e-127	hsa-miR-483- 3p		1.7e-164	hsa-miR-4465	9.4e-154
hsa-miR-6090	8e-149	hsa-miR-6834- 3p		1.6e-126	hsa-miR-4725- 5p		1.9e-164	hsa-miR-4687- 3p	9.6e-154
hsa-miR-29c-3p	1.3e-148	hsa-miR-4254		3.6e-126	hsa-miR-663a		1.1e-163	hsa-miR-3184- 3p	2.1e-152
hsa-miR-4455	4.2e-148	hsa-miR-16-5p		5.5e-125	hsa-miR-6794- 3p		2.9e-163	hsa-miR-5196- 3p	3e-152

## Sheet: Table S9
Table S9. A full list of 103 significant MF GO terms and list of top 20 enriched MF GO terms (out of 103)for BT474 cell line (adjusted p value < 0.05). Adj_pval - adjusted p value, signif - number of genes found to be significant in trastuzumab resistance development and assessed to the particular GO term, all - number of all genes annotated to the particular GO term, % - percent of genes signifi…
Significant MF GO terms			Enriched MF GO terms
ID	Term	Adjusted p-value	ID	Term	% signif/all
GO:0005515	protein binding	1.3e-12	GO:0003688	DNA replication origin binding	86
GO:0003697	single-strandedDNAbinding	2.1e-05	GO:0030983	mismatched DNA binding	86
GO:0003677	DNAbinding	3.9e-05	GO:0097617	annealing activity	85
GO:0003688	DNA replication originbinding	5.3e-05	GO:1990825	sequence-specific mRNA binding	80
GO:0030983	mismatched DNA binding	5.3e-05	GO:0008242	omega peptidase activity	77
GO:0003682	chromatinbinding	7.6e-05	GO:0043138	3'-5' DNA helicase activity	75
GO:0003723	RNAbinding	0.00013	GO:0031996	thioesterase binding	73
GO:0097617	annealingactivity	0.00014	GO:0004303	estradiol 17-beta-dehydrogenase activity	73
GO:0030331	estrogenreceptor binding	0.0009	GO:0000400	four-way junction DNA binding	69
GO:0048027	mRNA5'-UTRbinding	0.00111	GO:0031994	insulin-like growth factor I binding	69
GO:0008242	omegapeptidaseactivity	0.00117	GO:0016423	tRNA (guanine) methyltransferase activity	69
GO:0030291	proteinserine/threoninekinaseinhibitoractivity	0.00118	GO:0043142	single-stranded DNA-dependent ATPase activity	69
GO:0008536	RanGTPasebinding	0.00132	GO:0048027	mRNA 5'-UTR binding	65
GO:0042803	proteinhomodimerizationactivity	0.00183	GO:0015095	magnesium ion transmembrane transporter activity	65
GO:0004386	helicaseactivity	0.00221	GO:0045295	gamma-catenin binding	64
GO:1990825	sequence-specificmRNA binding	0.00257	GO:0016646	oxidoreductase activity, acting on the CH-NH group of donors, NAD or NADP as acceptor	63
GO:0016538	cyclin-dependentproteinserine/threoninekinaseregulatoractivity	0.0027	GO:0035613	RNA stem-loop binding	60
GO:0003735	structuralconstituentofribosome	0.00271	GO:0008536	Ran GTPase binding	59
GO:0043138	3'-5'DNAhelicaseactivity	0.00285	GO:0046625	sphingolipid binding	59
GO:0000400	four-wayjunction DNAbinding	0.00285	GO:0030331	estrogen receptor binding	58
GO:0016758	transferaseactivity,transferringhexosylgroups	0.00285
GO:0008134	transcriptionfactor binding	0.00338
GO:0005200	structuralconstituentofcytoskeleton	0.0034
GO:0008094	DNA-dependentATPaseactivity	0.00451
GO:0019843	rRNAbinding	0.00518
GO:0015095	magnesiumiontransmembranetransporteractivity	0.00575
GO:0000049	tRNAbinding	0.00629
GO:1990837	sequence-specificdouble-strandedDNAbinding	0.00645
GO:0016279	protein-lysineN-methyltransferaseactivity	0.00647
GO:0031994	insulin-likegrowthfactorI binding	0.00662
GO:0016423	tRNA(guanine)methyltransferaseactivity	0.00662
GO:0043142	single-strandedDNA-dependent ATPaseactivity	0.00662
GO:0000977	RNApolymeraseIIregulatoryregionsequence-specificDNAbinding	0.00665
GO:0031996	thioesterasebinding	0.00677
GO:0004303	estradiol17-beta-dehydrogenaseactivity	0.00677
GO:0019901	proteinkinasebinding	0.00766
GO:0008017	microtubulebinding	0.00865
GO:0042826	histonedeacetylasebinding	0.00926
GO:0008565	proteintransporteractivity	0.0096
GO:0003743	translationinitiationfactoractivity	0.01003
GO:0015215	nucleotidetransmembranetransporteractivity	0.01057
GO:0051219	phosphoproteinbinding	0.01089
GO:0047485	proteinN-terminus binding	0.01128
GO:0005085	guanyl-nucleotideexchangefactoractivity	0.01153
GO:0043022	ribosome binding	0.01174
GO:0016646	oxidoreductase activity, acting on the CH-NH group of donors, NAD orNADPasacceptor	0.01189
GO:0140096	catalyticactivity,actingonaprotein	0.01245
GO:0042393	histonebinding	0.01265
GO:0045296	cadherinbinding	0.01306
GO:0035198	miRNAbinding	0.01322
GO:0005524	ATPbinding	0.01333
GO:0046983	proteindimerizationactivity	0.01443
GO:0003779	actinbinding	0.01702
GO:0001191	transcriptional repressor activity, RNA polymerase II transcription factorbinding	0.01784
GO:0016407	acetyltransferaseactivity	0.01784
GO:0003714	transcriptioncorepressoractivity	0.01908
GO:0018024	histone-lysineN-methyltransferaseactivity	0.02054
GO:0004674	proteinserine/threoninekinaseactivity	0.02105
GO:0016765	transferaseactivity,transferringalkyloraryl(otherthanmethyl)groups	0.02364
GO:0016746	transferaseactivity,transferringacylgroups	0.02373
GO:0035613	RNA stem-loop binding	0.02386
GO:0009055	electrontransfer activity	0.02437
GO:0000166	nucleotidebinding	0.0248
GO:0000976	transcriptionregulatoryregionsequence-specificDNA binding	0.02523
GO:0016491	oxidoreductaseactivity	0.0255
GO:0001047	corepromoter binding	0.02562
GO:0043236	laminin binding	0.02574
GO:0004520	endodeoxyribonucleaseactivity	0.02576
GO:0048037	cofactor binding	0.02692
GO:0016408	C-acyltransferaseactivity	0.02831
GO:0003725	double-strandedRNA binding	0.02847
GO:0016887	ATPaseactivity	0.0294
GO:0044183	proteinbinding involved inproteinfolding	0.02982
GO:0008139	nuclearlocalizationsequencebinding	0.03038
GO:0002039	p53binding	0.03052
GO:0032266	phosphatidylinositol-3-phosphatebinding	0.03068
GO:0046982	proteinheterodimerizationactivity	0.0311
GO:0001076	transcription factor activity, RNA polymerase II transcription factorbinding	0.03112
GO:0045295	gamma-cateninbinding	0.03126
GO:0015248	steroltransporteractivity	0.03133
GO:0005215	transporteractivity	0.03294
GO:0003730	mRNA3'-UTRbinding	0.03476
GO:0017016	RasGTPasebinding	0.035
GO:0042974	retinoic acidreceptorbinding	0.03502
GO:0000983	transcription factor activity, RNA polymerase II core promoter sequence-specificDNAbinding	0.03592
GO:0042562	hormonebinding	0.0364
GO:0003729	mRNAbinding	0.03798
GO:0046625	sphingolipidbinding	0.03831
GO:0070717	poly-purinetract binding	0.03831
GO:0001221	transcriptioncofactorbinding	0.0384
GO:0008392	arachidonicacidepoxygenaseactivity	0.03925
GO:0035173	histonekinaseactivity	0.03925
GO:0016627	oxidoreductaseactivity, actingontheCH-CH groupof donors	0.03934
GO:0030170	pyridoxalphosphatebinding	0.04065
GO:0061630	ubiquitinproteinligaseactivity	0.04087
GO:0051787	misfoldedproteinbinding	0.0433
GO:0016209	antioxidantactivity	0.0435
GO:0004722	proteinserine/threoninephosphataseactivity	0.04541
GO:0045182	translationregulatoractivity	0.04625
GO:0005092	GDP-dissociationinhibitoractivity	0.04627
GO:0035254	glutamatereceptorbinding	0.04637
GO:0000981	RNA polymerase II transcription factor activity, sequence-specific DNAbinding	0.04732
GO:0019904	proteindomainspecificbinding	0.04999

## Sheet: Table S10
Table S10. A full list of 193 significant MF GO terms and list of top 20 enriched MF GO (out of 193) for SKBR3 cell line (adjusted p value < 0.05). Adj_pval - adjusted p value, signif - number of genes found to be significant in trastuzumab resistance development and assessed to the particular GO term, all - number of all genes annotated to the particular GO term, % - percent of genes significant…
MF GO term analysis for SKBR3 cell line
Significant MF GO terms			Enriched MF GO terms
ID	Term	Adjusted p-value	ID	Term	% signif/all
GO:0003723	RNAbinding	1e-30	GO:0061608	nuclear import signal receptor activity	100
GO:0003735	structuralconstituentofribosome	1.9e-17	GO:0008097	5S rRNA binding	100
GO:0045296	cadherinbinding	2.1e-13	GO:0016884	carbon-nitrogen ligase activity, with glutamine as amido-N- donor	100
GO:0031625	ubiquitinproteinligasebinding	5.5e-13	GO:0140142	nucleocytoplasmic carrier activity	95
GO:0005524	ATPbinding	2.2e-09	GO:0000339	RNA cap binding	94
GO:0019899	enzyme binding	5e-09	GO:0005123	death receptor binding	94
GO:0031492	nucleosomal DNAbinding	4.6e-08	GO:0031492	nucleosomal DNA binding	93
GO:0003697	single-strandedDNAbinding	8.4e-08	GO:0030515	snoRNA binding	93
GO:0005525	GTPbinding	2e-07	GO:0008353	RNA polymerase II carboxy-terminal domain kinase activity	93
GO:0008565	proteintransporteractivity	2.3e-07	GO:0003688	DNA replication origin binding	93
GO:0003924	GTPaseactivity	2.7e-07	GO:0032454	histone demethylase activity (H3-K9 specific)	92
GO:0019904	proteindomainspecificbinding	1.4e-06	GO:0009982	pseudouridine synthase activity	92
GO:0051287	NADbinding	2.6e-06	GO:0015037	peptide disulfide oxidoreductase activity	92
GO:0003725	double-strandedRNA binding	3.9e-06	GO:0016423	tRNA (guanine) methyltransferase activity	92
GO:0009055	electrontransfer activity	5e-06	GO:0097617	annealing activity	92
GO:0003684	damaged DNAbinding	7.2e-06	GO:0043142	single-stranded DNA-dependent ATPase activity	92
GO:0030515	snoRNAbinding	8.2e-06	GO:0016274	protein-arginine N-methyltransferase activity	92
GO:0051082	unfolded protein binding	2.6e-05	GO:0043138	3'-5' DNA helicase activity	92
GO:0042802	identicalproteinbinding	3.9e-05	GO:0043295	glutathione binding	91
GO:0008137	NADHdehydrogenase(ubiquinone)activity	4.2e-05	GO:0050786	RAGE receptor binding	91
GO:0019843	rRNAbinding	4.7e-05
GO:0042623	ATPaseactivity,coupled	5.1e-05
GO:0004386	helicaseactivity	5.2e-05
GO:0019901	proteinkinasebinding	5.2e-05
GO:0051539	4 iron,4sulfurcluster binding	5.5e-05
GO:0008536	RanGTPasebinding	8.9e-05
GO:0016836	hydro-lyaseactivity	0.00014
GO:0003743	translationinitiationfactoractivity	0.00028
GO:1990841	promoter-specificchromatinbinding	0.00035
GO:0043021	ribonucleoproteincomplexbinding	0.00038
GO:0003730	mRNA3'-UTRbinding	0.00041
GO:0016787	hydrolaseactivity	0.00043
GO:0047485	proteinN-terminus binding	0.00044
GO:0046982	proteinheterodimerizationactivity	0.00047
GO:0030331	estrogenreceptor binding	0.00053
GO:0004298	threonine-typeendopeptidaseactivity	0.00054
GO:0070628	proteasomebinding	0.00054
GO:0016616	oxidoreductase activity, acting on the CH-OH group of donors, NAD orNADPasacceptor	0.00075
GO:0030544	Hsp70protein binding	0.0008
GO:0000049	tRNAbinding	0.00081
GO:0044183	proteinbinding involved inproteinfolding	0.00084
GO:0016879	ligaseactivity,formingcarbon-nitrogenbonds	0.00088
GO:0003887	DNA-directedDNA polymeraseactivity	0.00091
GO:0000339	RNAcapbinding	0.00096
GO:0005123	death receptorbinding	0.00096
GO:0051087	chaperonebinding	0.00107
GO:0048027	mRNA5'-UTRbinding	0.00119
GO:0008353	RNApolymeraseIIcarboxy-terminal domainkinaseactivity	0.00165
GO:0004003	ATP-dependentDNAhelicaseactivity	0.00172
GO:0061630	ubiquitinproteinligaseactivity	0.00202
GO:0002039	p53binding	0.00204
GO:0008139	nuclearlocalizationsequencebinding	0.00222
GO:0030145	manganese ionbinding	0.00234
GO:0003756	proteindisulfideisomeraseactivity	0.00243
GO:0046966	thyroid hormonereceptorbinding	0.00244
GO:0019783	ubiquitin-likeprotein-specificproteaseactivity	0.00247
GO:0061608	nuclearimportsignalreceptoractivity	0.00248
GO:0008097	5SrRNAbinding	0.00248
GO:0016884	carbon-nitrogenligaseactivity,withglutamineasamido-N-donor	0.00248
GO:0004812	aminoacyl-tRNAligaseactivity	0.00254
GO:0000166	nucleotidebinding	0.00258
GO:0019888	proteinphosphataseregulatoractivity	0.00262
GO:0042393	histonebinding	0.00263
GO:0003688	DNA replication originbinding	0.00281
GO:0004674	proteinserine/threoninekinaseactivity	0.00293
GO:0030291	proteinserine/threoninekinaseinhibitoractivity	0.00301
GO:0051537	2 iron,2sulfurcluster binding	0.00303
GO:0017112	Rabguanyl-nucleotideexchangefactoractivity	0.00309
GO:0000287	magnesium ionbinding	0.00354
GO:0030234	enzymeregulatoractivity	0.00359
GO:0016779	nucleotidyltransferaseactivity	0.00364
GO:0061631	ubiquitinconjugatingenzymeactivity	0.0037
GO:0043531	ADPbinding	0.00386
GO:0003841	1-acylglycerol-3-phosphateO-acyltransferaseactivity	0.00397
GO:0004197	cysteine-typeendopeptidaseactivity	0.00424
GO:0034061	DNA polymeraseactivity	0.00448
GO:0045309	proteinphosphorylatedaminoacidbinding	0.0045
GO:0032947	protein-containingcomplexscaffoldactivity	0.0047
GO:0032454	histonedemethylaseactivity(H3-K9specific)	0.00479
GO:0009982	pseudouridinesynthaseactivity	0.00479
GO:0015037	peptidedisulfideoxidoreductaseactivity	0.00479
GO:0016423	tRNA(guanine)methyltransferaseactivity	0.00479
GO:0097617	annealingactivity	0.00479
GO:0043142	single-strandedDNA-dependent ATPaseactivity	0.00479
GO:0043130	ubiquitinbinding	0.00484
GO:0003713	transcriptioncoactivatoractivity	0.00511
GO:0004402	histoneacetyltransferaseactivity	0.00548
GO:0051787	misfoldedproteinbinding	0.00557
GO:0035035	histoneacetyltransferasebinding	0.00567
GO:0008022	proteinC-terminus binding	0.00608
GO:0008194	UDP-glycosyltransferaseactivity	0.00642
GO:0016891	endoribonucleaseactivity,producing5'-phosphomonoesters	0.00643
GO:0050681	androgenreceptorbinding	0.00669
GO:0008266	poly(U) RNAbinding	0.00751
GO:0140101	catalyticactivity,actingonatRNA	0.00801
GO:0070034	telomeraseRNAbinding	0.00809
GO:0016274	protein-arginineN-methyltransferaseactivity	0.00812
GO:0043138	3'-5'DNAhelicaseactivity	0.00812
GO:0017056	structuralconstituentofnuclear pore	0.00833
GO:0004842	ubiquitin-proteintransferaseactivity	0.00894
GO:0140096	catalyticactivity,actingonaprotein	0.00895
GO:0016491	oxidoreductaseactivity	0.01
GO:0016765	transferaseactivity,transferringalkyloraryl(otherthanmethyl)groups	0.0103
GO:0031386	protein tag	0.01041
GO:0042809	vitamin Dreceptorbinding	0.01041
GO:0043022	ribosome binding	0.01077
GO:0003746	translationelongationfactoractivity	0.01169
GO:0070182	DNApolymerasebinding	0.01169
GO:0016780	phosphotransferaseactivity,forothersubstitutedphosphategroups	0.01169
GO:0046961	proton-transportingATPaseactivity,rotationalmechanism	0.01169
GO:0017069	snRNAbinding	0.01207
GO:0043015	gamma-tubulinbinding	0.01213
GO:0070566	adenylyltransferaseactivity	0.01213
GO:0008171	O-methyltransferaseactivity	0.01226
GO:0016776	phosphotransferaseactivity,phosphategroupasacceptor	0.01361
GO:0043295	glutathione binding	0.01368
GO:0050786	RAGEreceptor binding	0.01368
GO:0001055	RNApolymeraseII activity	0.01368
GO:0004518	nucleaseactivity	0.01482
GO:0043175	RNA polymerasecoreenzyme binding	0.01496
GO:0070717	poly-purinetract binding	0.01498
GO:0051219	phosphoproteinbinding	0.01549
GO:0016887	ATPaseactivity	0.01565
GO:0051020	GTPasebinding	0.01621
GO:0003899	DNA-directed5'-3'RNApolymeraseactivity	0.01654
GO:0045182	translationregulatoractivity	0.01663
GO:0004177	aminopeptidaseactivity	0.01664
GO:0035259	glucocorticoidreceptorbinding	0.01666
GO:0005095	GTPaseinhibitoractivity	0.01666
GO:0004129	cytochrome-coxidaseactivity	0.01752
GO:0001671	ATPaseactivatoractivity	0.01752
GO:0044877	protein-containingcomplexbinding	0.0179
GO:0005158	insulinreceptorbinding	0.01815
GO:0019900	kinasebinding	0.01815
GO:0008134	transcriptionfactor binding	0.01823
GO:0004602	glutathioneperoxidaseactivity	0.0184
GO:0031072	heat shock proteinbinding	0.01865
GO:0004004	ATP-dependentRNAhelicaseactivity	0.01917
GO:0019903	proteinphosphatasebinding	0.01973
GO:0042826	histonedeacetylasebinding	0.021
GO:0016667	oxidoreductaseactivity, acting ona sulfurgroup ofdonors	0.02269
GO:0032451	demethylaseactivity	0.02285
GO:0005381	ironiontransmembranetransporteractivity	0.02288
GO:1990825	sequence-specificmRNA binding	0.02288
GO:0008474	palmitoyl-(protein)hydrolaseactivity	0.02288
GO:0016208	AMPbinding	0.02288
GO:0005225	volume-sensitiveanionchannelactivity	0.02288
GO:0004576	oligosaccharyltransferaseactivity	0.02288
GO:0004526	ribonucleaseP activity	0.02288
GO:0003729	mRNAbinding	0.02304
GO:0050662	coenzymebinding	0.02427
GO:0048487	beta-tubulinbinding	0.02547
GO:0048037	cofactorbinding	0.02555
GO:0033218	amide binding	0.02633
GO:0140097	catalyticactivity,actingonDNA	0.0264
GO:0070402	NADPHbinding	0.02642
GO:0016840	carbon-nitrogenlyaseactivity	0.02642
GO:0008242	omegapeptidaseactivity	0.02642
GO:0019902	phosphatasebinding	0.0269
GO:0016407	acetyltransferaseactivity	0.02702
GO:0016790	thiolesterhydrolaseactivity	0.02723
GO:1901567	fattyacidderivative binding	0.02733
GO:0004653	polypeptideN-acetylgalactosaminyltransferaseactivity	0.02736
GO:0001091	RNA polymeraseII basaltranscriptionfactorbinding	0.02756
GO:0043539	proteinserine/threoninekinaseactivatoractivity	0.02783
GO:0035064	methylatedhistonebinding	0.02997
GO:0019003	GDPbinding	0.02997
GO:0003682	chromatinbinding	0.03153
GO:0032266	phosphatidylinositol-3-phosphatebinding	0.03434
GO:0031491	nucleosomebinding	0.03478
GO:0004722	proteinserine/threoninephosphataseactivity	0.03501
GO:0080025	phosphatidylinositol-3,5-bisphosphatebinding	0.03554
GO:0018024	histone-lysineN-methyltransferaseactivity	0.0356
GO:0005548	phospholipidtransporteractivity	0.03565
GO:0008374	O-acyltransferaseactivity	0.03779
GO:0140142	nucleocytoplasmiccarrieractivity	0.03785
GO:0016895	exodeoxyribonucleaseactivity,producing5'-phosphomonoesters	0.03791
GO:0000175	3'-5'-exoribonucleaseactivity	0.04018
GO:0008094	DNA-dependentATPaseactivity	0.04055
GO:0008135	translationfactoractivity,RNAbinding	0.04093
GO:0016783	sulfurtransferaseactivity	0.04147
GO:0004861	cyclin-dependentproteinserine/threoninekinaseinhibitoractivity	0.04147
GO:0016706	oxidoreductase activity, acting on paired donors, with incorporation orreduction of molecularoxygen,2-oxoglutarateasonedonor,and incorporationofoneatomeachofoxygeninto both donors	0.04147
GO:0004659	prenyltransferaseactivity	0.04165
GO:0035613	RNA stem-loop binding	0.04165
GO:0003714	transcriptioncorepressoractivity	0.04246
GO:0004175	endopeptidaseactivity	0.04294
GO:0004712	proteinserine/threonine/tyrosinekinaseactivity	0.0456
GO:0070412	R-SMAD binding	0.04984
GO:0008308	voltage-gatedanionchannelactivity	0.04986
GO:0016668	oxidoreductase activity, acting on a sulfur group of donors, NAD(P) asacceptor	0.04988

[truncated: 7 more sheets: Table S11, Table S12, Table S13, Table S14, Table S15, Table S16, TableS17]
